# Supplementary material
Source: publisher site journal article supplement (https://www.spandidos-publications.com/4225/downloadSupplementary)
Supplement: Supplementary file 1 [file downloadSupplementary]

## Sheet: pathways
Table SV. KEGG pathway analysis.
CategoryL2	HE1	HE2	HE3	HE4	HE5	HE6	HE7	HE8	HE9	HE10	HE11	HE12	HE13	HE14	HE15	D160801	D160901	D161004	D161005	D161007	D170102	D170103	D170201	D170302	D170402	D170403	D170407	D170502	D170903	D180102	D180304	D180305	D180602	D180702	D180801	D180902	D181003
Biosynthesis of Other Secondary Metabolites	289792	292362	248715	289905	301025	270664	288290	267621	271051	257059	274588	281798	265151	272193	265059	59602	23478	23734	12829	116527	22390	24001	48120	25177	32190	60808	29050	15917	10500	5615	278938	265851	275642	284729	284006	286483	262553
Cancers	35871	27457	29836	40971	32113	36414	27704	38740	41380	33509	29853	31308	34923	32729	28701	8122	2126	3382	1154	10602	3174	3612	2118	3095	4273	5698	4004	1628	622	616	31105	30108	26642	29207	28897	32065	31764
Carbohydrate Metabolism	3657235	3888884	3139753	3567290	3719990	3556262	3775726	3624664	3833616	3424897	3488021	3356983	3611864	3635988	3569291	621640	308846	408096	180988	1520087	293413	314325	699079	308520	372833	706906	323984	190210	156948	66823	3386104	3503204	3558931	3610051	3596446	3711009	3461438
Cell Growth and Death	225140	255603	202407	242097	239383	227741	248407	229149	237609	221027	233428	221760	237015	228724	230605	48171	19743	28139	11814	95311	21800	21469	45034	20480	25490	51229	25951	14549	9995	4621	238577	227897	243375	246661	233671	224531	230434
Cell Motility	435988	460617	413655	580318	489911	539889	545580	381882	442926	440887	431457	414804	454729	521272	484912	38736	30854	17646	10556	140250	14729	20528	23450	45500	61248	41598	21039	21558	4868	4326	375566	283723	406225	489516	373150	504107	451635
Cellular Processes and Signaling	1487074	1874975	1399610	1601780	1680072	1676741	1911664	1576894	1853413	1536248	1791248	1568147	1671974	1683782	1684416	278001	124318	166430	65700	629100	124702	143851	224224	140459	176300	282854	147700	91922	52285	29986	1498076	1377466	1620081	1824695	1543617	1347346	1744939
Digestive System	31221	31982	25859	39597	33095	29809	30330	35049	28785	28212	29991	31962	30973	26695	26741	12328	2538	4573	1740	13474	4741	3428	5690	3417	2940	11144	4814	2872	1269	541	42233	39196	38887	35333	38314	30071	31664
Endocrine System	118760	125780	93154	130214	127788	127321	130345	117532	133629	114482	124298	111018	124816	129362	121478	29247	7342	12722	4489	37722	10311	11670	10864	9993	13689	23813	12507	6946	2745	1277	108609	95888	111197	125589	115896	124907	128891
Energy Metabolism	2264324	2484832	1994218	2258685	2377708	2235359	2426751	2217292	2384809	2152494	2305542	2250173	2244407	2250133	2223821	430136	178664	229229	97212	868524	179370	194566	343048	189305	237282	424700	218988	127958	77781	41610	2166454	2065761	2198876	2383881	2229712	2194027	2238587
Enzyme Families	828899	901002	728643	875970	860235	806096	872721	834208	858499	786572	823405	799819	836419	817849	811041	167667	68887	95369	40632	341974	76718	74154	155133	70983	89167	179183	89181	49652	34391	15986	832094	814258	847716	866222	845048	813408	813551
Genetic Information Processing	1157468	1363926	1086738	1210504	1260531	1197975	1354706	1174828	1291347	1164426	1274920	1170147	1242054	1239302	1240001	204660	100864	132045	56426	488875	95624	107201	217008	102970	145050	238423	119491	68632	47589	23427	1152256	1090597	1218230	1300735	1182689	1140797	1223703
Glycan Biosynthesis and Metabolism	1163861	1341235	1093946	1260968	1266954	1193582	1277838	1246899	1276461	1139203	1255266	1212637	1215802	1151072	1173331	289703	97783	126963	58683	497116	124004	124072	216346	106636	133254	273053	140421	76364	49452	25165	1282819	1220199	1269981	1306773	1243190	1060181	1204731
Immune System Diseases	22474	29669	21560	23612	28296	25230	30940	22598	24324	23377	27800	22939	25052	25675	25516	4636	2548	2609	1095	11207	2084	2436	4278	2697	2914	4488	2273	1785	884	313	23468	21003	26546	29417	25643	23307	27949
Infectious Diseases	156706	179946	138546	166495	159899	152188	173533	164650	166284	152261	156106	153320	167723	157246	161341	34485	15703	20016	9821	75348	16946	14726	43109	14765	17811	42236	18283	10374	9195	3654	174058	177232	181980	168829	170824	146237	157767
Membrane Transport	4618303	4393751	3990662	4245623	4393923	4329627	4449176	4273175	4650626	4210439	3900511	3959117	4383360	4588867	4299368	424220	399481	503747	230922	1929757	267516	325243	983825	361080	539862	729346	348071	206843	215533	92885	3624329	3916433	4042186	4043212	4072150	4586746	3937880
Metabolism of Cofactors and Vitamins	1915286	2182232	1710821	2076235	2033172	1920105	2118849	1895987	2053839	1809445	2067609	1913646	1973337	1966548	1948838	351054	145327	210832	83388	711379	173168	170450	295702	149988	209459	348827	196935	108033	65971	39551	1893370	1688691	1919708	2103799	1896586	1802086	1957570
Metabolism of Other Amino Acids	618991	701125	542077	624657	658387	630089	697796	604344	658973	588208	639289	602751	628698	638402	633195	113451	53364	68111	30325	267253	51167	54439	118920	54717	68337	120835	59517	34829	26596	12722	608345	590123	645212	671207	630578	595601	631559
Metabolism of Terpenoids and Polyketides	712315	830454	638750	733697	770382	710586	809764	701052	748323	682962	765533	714319	736447	732202	743226	141370	59844	78095	34991	292473	65919	63768	135868	58822	78600	147332	76421	42094	29763	14040	734224	696219	759056	790169	757270	710285	734027
Nervous System	29691	32123	22294	21302	32750	30705	31992	26892	29511	24483	28125	27242	27489	27347	26709	5284	1852	2136	1160	10099	2073	1833	3908	2284	1977	6161	1808	1468	912	460	28814	26858	29588	31676	31731	31199	32598
Nucleotide Metabolism	1827577	1999859	1614579	1889239	1902958	1791564	1924907	1842007	1893106	1737115	1813178	1745448	1863079	1800436	1793663	362483	158898	217844	94610	777441	173656	168861	372166	160397	200712	392561	202696	111291	82256	38594	1876557	1826713	1907908	1921375	1875174	1784196	1804948
Replication and Repair	3885976	4579756	3535925	4036897	4218482	3983721	4479560	3989654	4289312	3838526	4200557	3846342	4165215	4041976	4073999	782310	333897	480568	197918	1648605	362879	365330	752175	346956	432455	848387	424060	244379	167463	77838	4055011	3896018	4234588	4400667	4096809	3809506	4146730
Signal Transduction	481125	534539	416745	489906	487167	497404	561754	453146	538942	469718	483476	451466	499199	539440	517704	51735	41722	43443	21365	194081	27623	33671	87530	41113	59428	73059	39046	23235	18795	8542	409822	404223	464136	502411	442072	451949	485196
Signaling Molecules and Interaction	84454	71248	67564	76945	73685	67824	63634	86267	75724	71386	56796	68392	76037	68605	68047	24269	8684	9503	5934	44219	9702	9262	27688	7697	8089	30422	9390	5126	5808	2017	84507	100520	84035	64322	85497	82422	61505
Transcription	842948	952725	741138	856925	877277	866126	954694	874235	947253	826183	857393	789220	891163	882424	870938	141555	77122	99605	44045	376567	70324	74807	175182	75862	91315	176142	75118	49832	38674	16408	813312	837566	882776	900020	866621	838603	871811
Translation	2593233	2998187	2346773	2701327	2758026	2628246	2908237	2651218	2790327	2560255	2713575	2523235	2763801	2673613	2679170	494935	230223	323604	135564	1119540	241193	245105	529796	233249	296195	546409	274199	160165	117023	53757	2676221	2594156	2782776	2856767	2691429	2573090	2684189
Transport and Catabolism	104598	128182	86384	106645	117430	113557	125017	111708	119135	102956	114885	103736	115608	111067	112712	28908	8607	10503	5422	46971	11629	11127	19693	10771	10290	27553	11193	6216	4551	1800	115398	113671	120574	122901	116599	106350	119660
